# Supplementary material
Source: Springer Nature journal article supplement (https://www.springermedizin.de/resource/supplementary/12913_2014_3390_MOESM6_ESM.pdf/9532652)

# Congestive Cardiac Failure (p<0.001)\*

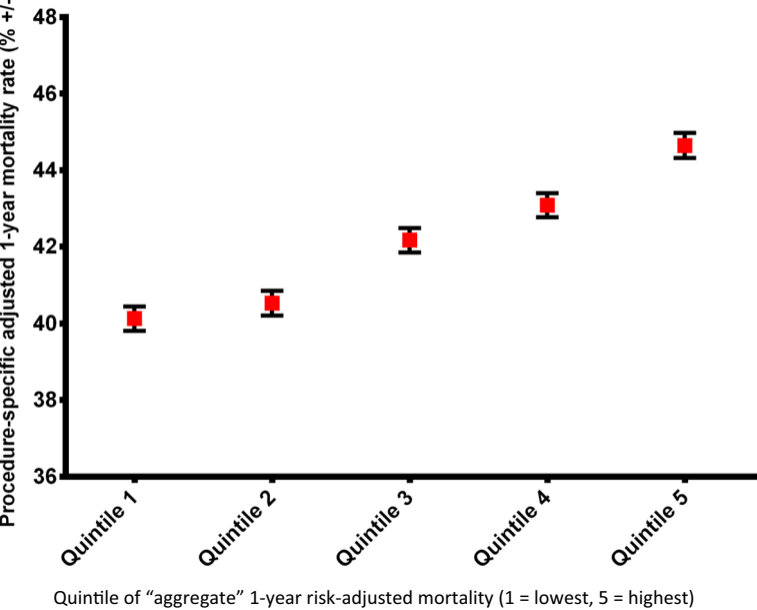

Supplement: MOESM6 [file 9532652]
